# Supplementary material
Source: publisher figshare collection journal article supplement (https://acs.figshare.com/ndownloader/files/14602061)
Supplement: Supplementary file 1 [file 14602061]

## Supporting information

### Decreasing wound edge stress enhances leader cell formation during collective smooth muscle cell migration

*Zachary S. Dean<sup>a,†</sup>, Nima Jamilpour<sup>b</sup>, Marvin J. Slepian<sup>a,c</sup>, and Pak Kin Wong<sup>a,b,d,\*</sup>*

<sup>a</sup> Department of Biomedical Engineering, The University of Arizona, Tucson AZ 85721, USA.

<sup>b</sup> Department of Aerospace and Mechanical Engineering, The University of Arizona, Tucson AZ 85721, USA.

<sup>c</sup> Sarver Heart Center, College of Medicine, The University of Arizona, Tucson AZ 85721, USA.

<sup>d</sup> Departments of Biomedical Engineering, Mechanical Engineering and Surgery, The Pennsylvania State University, University Park, PA, 16802, USA

† Current address: Biotechnology and Planetary Protection Group, Jet Propulsion  
Laboratory, California Institute of Technology, Pasadena, California, USA

\*Correspondence should be addressed to Pak Kin Wong. Tel: +1-814-863-5267; E-mail:

[pak@engr.psu.edu](mailto:pak@engr.psu.edu)

6 Pages, 3 Figures, and 2 Tables

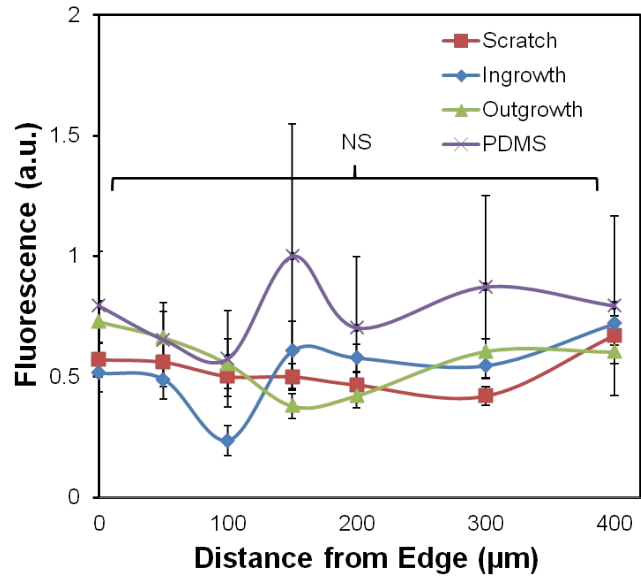

Figure S1. The random probe was transfected into collectively migrating smooth muscle cells. No statistical significance was measured at any point. NS = not significant. One-way ANOVA was performed.

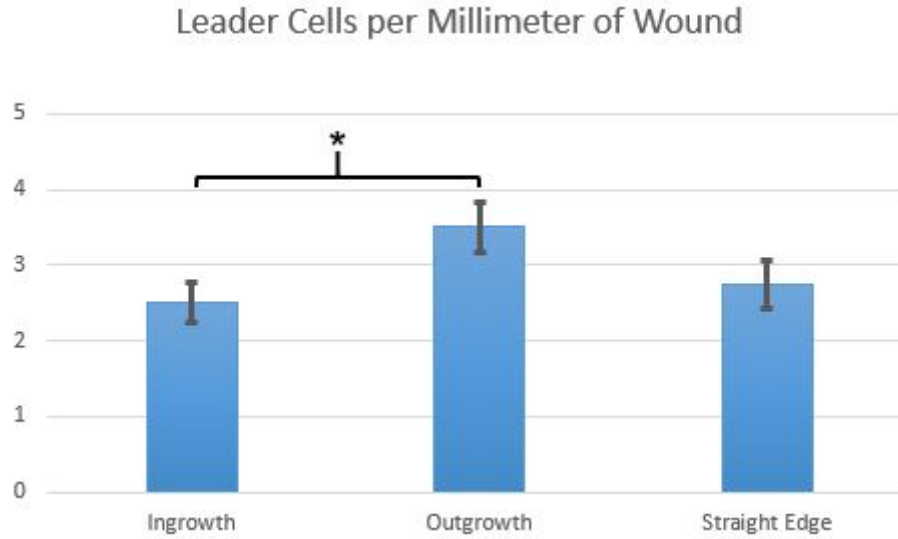

Figure S2. The outgrowth assay increases the density of leader cells. We measured the number of leader cells present over the course of a constant length of 1 mm of starting wound edge in each image. As the outgrowth and ingrowth assays are curved, these measurements took into account the arc length of each assay's circumference when measuring the starting length.

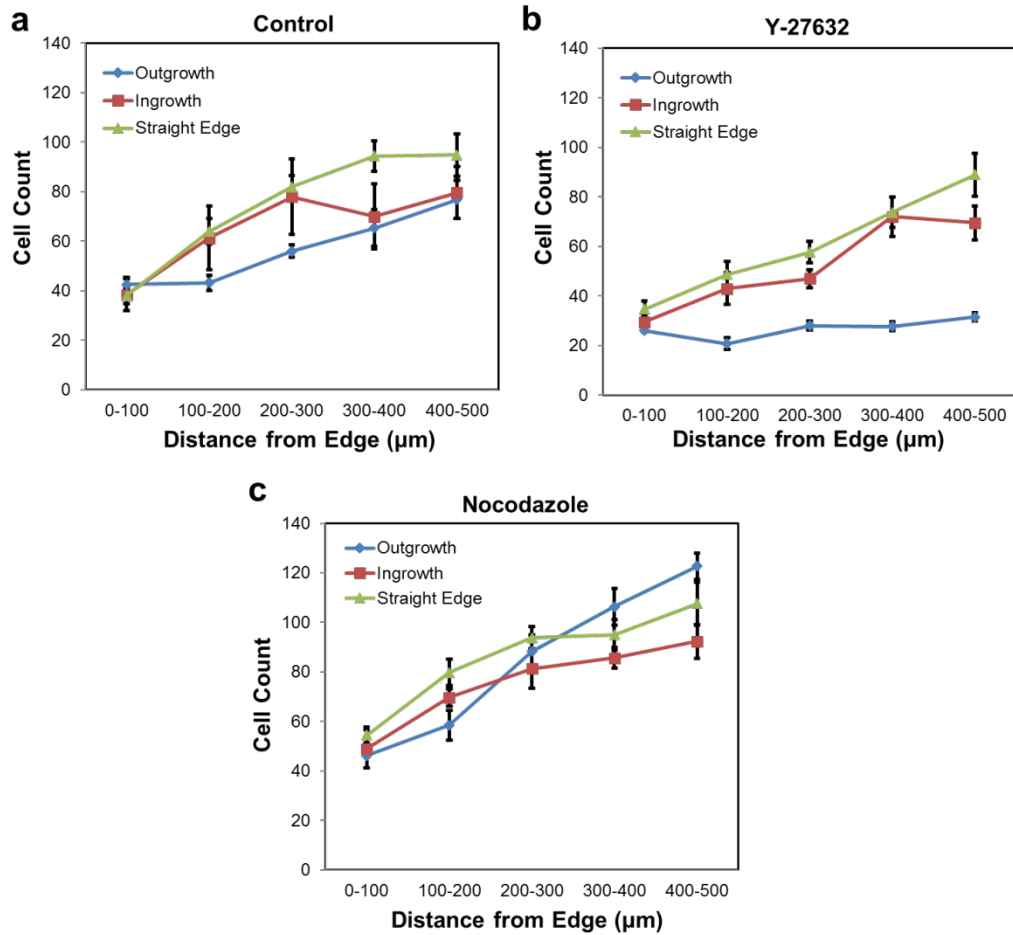

Figure S3. The number of cells versus location in relation to the wound edge was measured. The number of cells was evaluated in (a) control (no drug), (b) Y-27632 addition, and (c) nocodazole. The data is from the same experiments presented in Figure 9. One-way ANOVA analysis with post hoc Tukey's multiple comparison test performed on these data.

| Target Gene        | Probe Type   | Sequence/Fluorophore                             | Length (nucleotides) | $\Delta G_{DO}$ (kcal/mol) | $\Delta G_{DT}$ (kcal/mol) |
|--------------------|--------------|--------------------------------------------------|----------------------|----------------------------|----------------------------|
| $\beta$ 3-integrin | Donor (D)    | 5' /6-FAM/ <b><u>TCCACTGCTATATGAGTCT</u></b> 3'  | 20                   | -10.8                      | -21.6                      |
|                    | Quencher (Q) | 5' <b><u>TAGCATTGGA</u></b> /lowa Black FQ/ 3'   | 10                   |                            |                            |
|                    | Target (T)   | 5' AAGACTCATATAGCATTGGA 3'                       | 20                   |                            |                            |
| $\beta$ -actin     | Donor (D)    | 5' /6-FAM/ <b><u>AGGAAGGAAGGC</u></b> TGGAGAG 3' | 20                   | -10.6                      | -24.9                      |
|                    | Quencher (Q) | 5' <b><u>CTTCCTTCCT</u></b> /lowa Black FQ/ 3'   | 10                   |                            |                            |
|                    | Target (T)   | 5' CTCTCCAGCCTTCCTCCT 3'                         | 20                   |                            |                            |
| DII4               | Donor (D)    | 5' /6-FAM/ <b><u>AAGGGCAGTTGGAGAGGGTT</u></b> 3' | 20                   | -11.8                      | -25.9                      |
|                    | Quencher (Q) | 5' <b><u>AACTGCCCTT</u></b> /lowa Black FQ/ 3'   | 10                   |                            |                            |
|                    | Target (T)   | 5' AACCTCTCCAAGTCCCTT 3'                         | 20                   |                            |                            |
| Notch1             | Donor (D)    | 5' /6-FAM/ <b><u>TGCGGTCTGTCTGGTTGTGC</u></b> 3' | 20                   | -12.8                      | -27.5                      |
|                    | Quencher (Q) | 5' <b><u>ACAGACC</u></b> GCA/lowa Black FQ/ 3'   | 10                   |                            |                            |
|                    | Target (T)   | 5' GCACAACCAGACAGACCGCA 3'                       | 20                   |                            |                            |
| Random             | Donor (D)    | 5' /6-FAM/ <b><u>ACGCGACAAGCGCACCGATA</u></b> 3' | 20                   | -12.7                      | -29.4                      |
|                    | Quencher (Q) | 5' <b><u>CTTGTCCGT</u></b> /lowa Black FQ/ 3'    | 10                   |                            |                            |
|                    | Target (T)   | 5' TATCGGTGCGCTTGTGCGGT 3'                       | 20                   |                            |                            |

Table S1. The dsLNA probe design for detecting  $\beta$ -actin,  $\beta$ 3-integrin, and the random (scrambled) probe. LNA monomers are bolded and underlined, and normal DNA monomers are in regular text. The fluorophore or fluorescence quencher of each probe is bolded and in red.

| Outgrowth                                 |         |         | Ingrowth                                  |        |         | Straight Edge                             |        |         |
|-------------------------------------------|---------|---------|-------------------------------------------|--------|---------|-------------------------------------------|--------|---------|
| Migration straightness                    |         |         | Migration straightness                    |        |         | Migration straightness                    |        |         |
|                                           | Peak 1  | Peak 2  |                                           | Peak 1 | Peak 2  |                                           | Peak 1 | Peak 2  |
| $\lambda$                                 | 0.672   | 0.328   | $\lambda$                                 | 0.840  | 0.160   | $\lambda$                                 | 0.757  | 0.243   |
| $\mu$                                     | 0.485   | 0.747   | $\mu$                                     | 0.354  | 0.745   | $\mu$                                     | 0.360  | 0.562   |
| $\sigma$                                  | 0.150   | 0.589   | $\sigma$                                  | 0.172  | 0.075   | $\sigma$                                  | 0.072  | 0.034   |
| Mean migration speed ( $\mu\text{m/hr}$ ) |         |         | Mean migration speed ( $\mu\text{m/hr}$ ) |        |         | Mean migration speed ( $\mu\text{m/hr}$ ) |        |         |
|                                           | Peak 1  | Peak 2  |                                           | Peak 1 | Peak 2  |                                           | Peak 1 | Peak 2  |
| $\lambda$                                 | 0.900   | 0.100   | $\lambda$                                 | 0.816  | 0.184   | $\lambda$                                 | 0.791  | 0.209   |
| $\mu$                                     | 15.956  | 24.519  | $\mu$                                     | 12.078 | 21.228  | $\mu$                                     | 12.175 | 21.156  |
| $\sigma$                                  | 2.473   | 1.200   | $\sigma$                                  | 4.885  | 3.847   | $\sigma$                                  | 2.180  | 1.880   |
| $\beta$ -actin dsLNA probe signal         |         |         | $\beta$ -actin dsLNA probe signal         |        |         | $\beta$ -actin dsLNA probe signal         |        |         |
|                                           | Peak 1  | Peak 2  |                                           | Peak 1 | Peak 2  |                                           | Peak 1 | Peak 2  |
| $\lambda$                                 | 0.564   | 0.436   | $\lambda$                                 | 0.576  | 0.424   | $\lambda$                                 | 0.592  | 0.408   |
| $\mu$                                     | 126.832 | 415.310 | $\mu$                                     | 88.059 | 238.170 | $\mu$                                     | 74.345 | 239.229 |
| $\sigma$                                  | 58.047  | 231.705 | $\sigma$                                  | 48.811 | 118.267 | $\sigma$                                  | 39.670 | 124.326 |
| Random dsLNA probe signal                 |         |         | Random dsLNA probe signal                 |        |         | Random dsLNA probe signal                 |        |         |
|                                           | Peak 1  | Peak 2  |                                           | Peak 1 | Peak 2  |                                           | Peak 1 | Peak 2  |
| $\lambda$                                 | 0.843   | 0.157   | $\lambda$                                 | 0.756  | 0.244   | $\lambda$                                 | 0.432  | 0.568   |
| $\mu$                                     | 31.064  | 107.481 | $\mu$                                     | 16.575 | 73.482  | $\mu$                                     | 11.742 | 50.349  |
| $\sigma$                                  | 16.859  | 34.421  | $\sigma$                                  | 15.002 | 23.025  | $\sigma$                                  | 6.507  | 29.476  |

Table S2. A table summarizing the bimodal analyses of the distributions. The overlap ( $\lambda$ ), the mean ( $\mu$ ), and the standard deviation ( $\sigma$ ) of the peaks are indicated for each wound scenario.
